# Supplementary material for: Role of VEGF Polymorphisms in the Susceptibility and Severity of Interstitial Lung Disease
Source: MDPI journal article supplement (doi:10.3390/biomedicines9050458), 2021-04-22
Supplement: s1 [file s1]

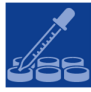

Supplementary

**Table 1.** Demographic and clinical characteristics of the 192 non-IIP patients included in this study.

| Characteristic                                  | Autoimmune ILDs<br>(n = 108) | Hypersensitivity<br>Pneumonitis (n = 47) | Sarcoidosis<br>(n = 10) | Other ILDs<br>(n = 27) |
|-------------------------------------------------|------------------------------|------------------------------------------|-------------------------|------------------------|
| Sex (men/women), n (%)                          | 57/51 (52.8/47.2)            | 32/15 (68.1/31.9)                        | 7/3 (70.0/30.0)         | 8/19 (29.6/70.4)       |
| Age at the time of the study (years), mean ± SD | 60.6 ± 9.8                   | 61.2 ± 10.0                              | 53.4 ± 14.2             | 50.7 ± 10.4            |
| Smoking history, n (%)                          | 65 (64.4)                    | 26 (55.3)                                | 4 (40)                  | 21 (77.8)              |
| Packs of cigarettes per year, mean ± SD         | 26.5 ± 18.0                  | 28.8 ± 19.4                              | 12.0 ± 12.1             | 22.3 ± 19.6            |
| Pulmonary function tests                        |                              |                                          |                         |                        |
| FVC (% predicted), mean ± SD                    | 82.7 ± 24.7                  | 77.6 ± 24.1                              | 72.0 ± 30.2             | 88.9 ± 24.4            |
| FEV1 (% predicted), mean ± SD                   | 79.5 ± 24.4                  | 72.3 ± 24.6                              | 57.6 ± 20.3             | 67.4 ± 26.0            |
| DLCO (% predicted), mean ± SD                   | 37.4 ± 14.8                  | 39.4 ± 21.1                              | 49.7 ± 17.4             | 30.7 ± 10.9            |

DLCO: diffusing capacity of the lungs for carbon monoxide; FEV1: forced expiratory volume in one second; FVC: forced vital capacity; IIP: idiopathic interstitial pneumonia; ILD: interstitial lung disease; SD: standard deviation.

**Table 2.** Statistical power estimation of the analysis of the susceptibility of VEGF in ILD according to different allele frequencies and ORs.

| Allele Frequency | OR = 1.1 | OR = 1.2 | OR = 1.3 | OR = 1.4 | OR = 1.5 | OR = 1.6 | OR = 1.7 | OR = 2.0 |
|------------------|----------|----------|----------|----------|----------|----------|----------|----------|
| 10%              | 10%      | 23%      | 44%      | 65%      | 82%      | 92%      | 97%      | 100%     |
| 20%              | 13%      | 37%      | 66%      | 87%      | 96%      | 99%      | 100%     | 100%     |
| 30%              | 16%      | 46%      | 77%      | 94%      | 99%      | 100%     | 100%     | 100%     |
| 40%              | 18%      | 42%      | 70%      | 96%      | 99%      | 100%     | 100%     | 100%     |
| 50%              | 18%      | 52%      | 82%      | 96%      | 99%      | 100%     | 100%     | 100%     |

Power estimated for a prevalence of interstitial lung disease of 5 cases / 100,000 inhabitants. ILD: interstitial lung disease; OR: odds ratio; VEGF: vascular endothelial growth factor.

**Table S3.** Statistical power estimation of the analysis of the severity of VEGF in ILD according to different allele frequencies and ORs.

| Allele Frequency | OR = 1.1 | OR = 1.2 | OR = 1.3 | OR = 1.4 | OR = 1.5 | OR = 1.6 | OR = 1.7 | OR = 2.0 |
|------------------|----------|----------|----------|----------|----------|----------|----------|----------|
| 10%              | 7%       | 13%      | 23%      | 36%      | 49%      | 63%      | 74%      | 94%      |
| 20%              | 9%       | 20%      | 36%      | 55%      | 71%      | 84%      | 92%      | 99%      |
| 30%              | 10%      | 24%      | 44%      | 65%      | 81%      | 91%      | 96%      | 100%     |
| 40%              | 11%      | 26%      | 48%      | 69%      | 84%      | 93%      | 97%      | 100%     |
| 50%              | 11%      | 27%      | 48%      | 69%      | 84%      | 93%      | 97%      | 100%     |

Power estimated for a prevalence of idiopathic interstitial pneumonia of 16 cases / 100,000 inhabitants. ILD: interstitial lung disease; OR: odds ratio; VEGF: vascular endothelial growth factor.

**Table S4.** Genotype, allele and carrier frequencies of *VEGF* polymorphisms in patients with IIP, autoimmune ILDs, hypersensitivity pneumonitis, sarcoidosis and other ILDs.

| <i>VEGF</i> Polymorphism | Genotype/Allele/ Carriers | IIP Patients % (n/N) | Autoimmune ILDs % (n/N) | Hypersensitivity Pneumonitis % (n/N) | Sarcoidosis % (n/N) | Other ILDs* % (n/N) |
|--------------------------|---------------------------|----------------------|-------------------------|--------------------------------------|---------------------|---------------------|
| rs833061                 | TT                        | 28.7 (70/244)        | 42.6 (46/108)           | 28.3 (13/46)                         | 40.0 (4/10)         | 33.3 (9/27)         |
|                          | TC                        | 49.2 (120/244)       | 39.8 (43/108)           | 56.5 (26/46)                         | 50.0 (5/10)         | 48.2 (13/27)        |
|                          | CC                        | 22.1 (54/244)        | 17.6 (19/108)           | 15.2 (7/46)                          | 10.0 (1/10)         | 18.5 (5/27)         |
|                          | T                         | 53.3 (260/488)       | 62.5 (135/216)          | 56.5 (52/92)                         | 65.0 (13/20)        | 57.4 (31/54)        |
|                          | C                         | 46.7 (228/488)       | 37.5 (81/216)           | 43.5 (40/92)                         | 35.0 (7/20)         | 42.6 (23/54)        |
|                          | C non-carriers            | 28.7 (70/244)        | 42.6 (46/108)           | 28.3 (13/46)                         | 40.0 (4/10)         | 33.3 (9/27)         |
|                          | C carriers                | 71.3 (174/244)       | 57.4 (162/108)          | 71.7 (33/46)                         | 60.0 (6/10)         | 66.7 (18/27)        |
| rs1570360                | GG                        | 47.5 (116/244)       | 60.7 (65/107)           | 63.1 (29/46)                         | 70.0 (7/10)         | 55.6 (15/27)        |
|                          | GA                        | 43.4 (106/244)       | 29.9 (32/107)           | 30.4 (14/46)                         | 20.0 (2/10)         | 40.7 (11/27)        |
|                          | AA                        | 9.1 (22/244)         | 9.4 (10/107)            | 6.5 (3/46)                           | 10.0 (1/10)         | 3.7 (1/27)          |
|                          | G                         | 69.3 (338/488)       | 75.7 (162/214)          | 78.3 (72/92)                         | 80.0 (16/20)        | 75.9 (41/54)        |
|                          | A                         | 30.7 (150/488)       | 24.3 (52/214)           | 21.7 (20/92)                         | 20.0 (4/20)         | 24.1 (13/54)        |
|                          | A non-carriers            | 47.5 (116/244)       | 60.7 (65/107)           | 63.1 (29/46)                         | 70.0 (7/10)         | 55.6 (15/27)        |
|                          | A carriers                | 52.5 (128/244)       | 39.3 (42/107)           | 36.9 (17/46)                         | 30.0 (3/10)         | 44.4 (12/27)        |
| rs2010963                | GG                        | 44.7 (109/244)       | 39.8 (43/108)           | 43.5 (20/46)                         | 30.0 (3/10)         | 44.4 (12/27)        |
|                          | GC                        | 42.2 (103/244)       | 41.7 (45/108)           | 50.0 (23/46)                         | 40.0 (4/10)         | 48.2 (13/27)        |
|                          | CC                        | 13.1 (32/244)        | 18.5 (20/108)           | 6.5 (3/46)                           | 30.0 (3/10)         | 7.4 (2/27)          |
|                          | G                         | 65.8 (321/488)       | 60.7 (131/216)          | 68.5 (63/92)                         | 50.0 (10/20)        | 68.5 (37/54)        |
|                          | C                         | 34.2 (167/488)       | 39.3 (85/216)           | 31.5 (29/92)                         | 50.0 (10/20)        | 31.5 (17/54)        |
|                          | C non-carriers            | 44.7 (109/244)       | 39.8 (43/108)           | 43.5 (20/46)                         | 30.0 (3/10)         | 44.4 (12/27)        |
|                          | C carriers                | 55.3 (135/244)       | 60.2 (65/108)           | 56.5 (26/46)                         | 70.0 (7/10)         | 55.6 (15/27)        |
| rs3025020                | CC                        | 50.4 (123/244)       | 55.1 (59/107)           | 63.0 (29/46)                         | 30.0 (3/10)         | 40.7 (11/27)        |
|                          | CT                        | 39.8 (97/244)        | 40.2 (43/107)           | 30.4 (14/46)                         | 50.0 (5/10)         | 48.2 (13/27)        |
|                          | TT                        | 9.8 (24/244)         | 4.7 (5/107)             | 6.6 (3/46)                           | 20.0 (2/10)         | 11.1 (3/27)         |
|                          | C                         | 70.3 (343/488)       | 75.2 (161/214)          | 78.3 (72/92)                         | 55.0 (11/20)        | 64.8 (35/54)        |
|                          | T                         | 29.7 (145/488)       | 24.8 (53/214)           | 21.7 (20/92)                         | 45.0 (9/20)         | 35.2 (19/54)        |
|                          | T non-carriers            | 50.4 (123/244)       | 55.1 (59/107)           | 63.0 (29/46)                         | 30.0 (3/10)         | 40.7 (11/27)        |
|                          | T carriers                | 49.6 (121/244)       | 44.9 (48/107)           | 37.0 (17/46)                         | 70.0 (7/10)         | 59.3 (16/27)        |
| rs3025039                | CC                        | 77.5 (189/244)       | 68.5 (74/108)           | 72.4 (34/47)                         | 80.0 (8/10)         | 74.1 (20/27)        |
|                          | CT                        | 20.5 (50/244)        | 26.9 (29/108)           | 25.5 (12/47)                         | 10.0 (1/10)         | 25.9 (7/27)         |
|                          | TT                        | 2.0 (5/244)          | 4.6 (5/108)             | 2.1 (1/47)                           | 10.0 (1/10)         | 0                   |
|                          | C                         | 87.7 (428/488)       | 81.9 (177/216)          | 85.1 (80/94)                         | 85.0 (17/20)        | 87.0 (47/54)        |
|                          | T                         | 12.3 (60/488)        | 18.1 (39/216)           | 14.9 (14/94)                         | 15.0 (3/20)         | 13.0 (7/54)         |
|                          | T non-carriers            | 77.5 (189/244)       | 68.5 (74/108)           | 72.4 (34/47)                         | 80.0 (8/10)         | 74.1 (20/27)        |
|                          | T carriers                | 22.5 (55/244)        | 31.5 (34/108)           | 27.6 (13/47)                         | 20.0 (2/10)         | 25.9 (7/27)         |

IIP: idiopathic interstitial pneumonia; ILD: interstitial lung disease; N: total number of individuals successfully genotyped; VEGF: vascular endothelial growth. \*Other ILDs include patients with lymphangioleiomyomatosis, Langerhans' cell histiocytosis and drug-associated ILD. All the genotype, allele and carrier frequencies did not show statistically significant differences

**Table S5.** Genotype, allele and carrier frequencies of VEGF polymorphisms in the whole cohort of ILD patients and healthy controls, stratified according to sex.

| VEGF Polymorphism | Genotype /Allele/ Carriers | MEN                  |                  |                  |               | WOMEN                |                  |                  |         |
|-------------------|----------------------------|----------------------|------------------|------------------|---------------|----------------------|------------------|------------------|---------|
|                   |                            | ILD patients % (n/N) | Controls % (n/N) | OR [95% CI]      | p value       | ILD patients % (n/N) | Controls % (n/N) | OR [95% CI]      | p value |
| rs833061          | TT                         | 31.7 (93/293)        | 31.1 (79/254)    | Reference        | -             | 34.5 (49/142)        | 26.7 (72/270)    | Reference        | -       |
|                   | TC                         | 49.2 (144/293)       | 45.7 (116/254)   | 1.05 [0.72-1.55] | 0.79          | 44.4 (63/142)        | 51.5 (139/270)   | 0.67 [0.42-1.06] | 0.09    |
|                   | CC                         | 19.1 (56/293)        | 23.2 (59/254)    | 0.81 [0.50-1.29] | 0.37          | 21.1 (30/142)        | 21.9 (59/270)    | 0.75 [0.42-1.32] | 0.32    |
|                   | T                          | 56.3 (330/586)       | 53.9 (274/508)   | Reference        | -             | 56.7 (161/284)       | 52.4 (283/540)   | Reference        | -       |
|                   | C                          | 43.7 (256/586)       | 46.1 (234/508)   | 0.91 [0.72-1.15] | 0.43          | 43.3 (123/284)       | 47.6 (257/540)   | 0.84 [0.63-1.12] | 0.24    |
|                   | C non-carriers             | 31.7 (93/293)        | 31.1 (79/254)    | Reference        | -             | 34.5 (49/142)        | 26.7 (72/270)    | Reference        | -       |
|                   | C carriers                 | 68.3 (200/293)       | 68.9 (175/254)   | 0.97 [0.68-1.39] | 0.87          | 65.5 (93/142)        | 73.3 (198/270)   | 0.69 [0.45-1.07] | 0.10    |
| rs1570360         | GG                         | 54.3 (159/293)       | 48.0 (119/248)   | Reference        | -             | 51.8 (73/141)        | 48.5 (131/270)   | Reference        | -       |
|                   | GA                         | 36.5 (107/293)       | 41.9 (104/248)   | 0.77 [0.54-1.10] | 0.15          | 41.1 (58/141)        | 41.9 (113/270)   | 0.92 [0.60-1.41] | 0.71    |
|                   | AA                         | 9.2 (27/293)         | 10.1 (25/248)    | 0.81 [0.45-1.46] | 0.48          | 7.1 (10/141)         | 9.6 (26/270)     | 0.69 [0.32-1.51] | 0.35    |
|                   | G                          | 72.5 (425/586)       | 68.9 (342/496)   | Reference        | -             | 72.3 (204/282)       | 69.4 (375/540)   | Reference        | -       |
|                   | A                          | 27.5 (161/586)       | 31.1 (154/496)   | 0.84 [0.65-1.09] | 0.20          | 27.7 (78/282)        | 30.6 (165/540)   | 0.87 [0.63-1.20] | 0.39    |
|                   | A non-carriers             | 54.3 (159/293)       | 48.0 (119/248)   | Reference        | -             | 51.8 (73/141)        | 48.5 (131/270)   | Reference        | -       |
|                   | A carriers                 | 45.7 (134/293)       | 52.0 (129/248)   | 0.78 [0.55-1.09] | 0.15          | 48.2 (68/141)        | 51.5 (139/270)   | 0.88 [0.58-1.32] | 0.53    |
| rs2010963         | GG                         | 42.3 (124/293)       | 42.8 (110/257)   | Reference        | -             | 44.4 (63/142)        | 44.6 (121/271)   | Reference        | -       |
|                   | GC                         | 44.0 (129/293)       | 45.1 (116/257)   | 0.99 [0.69-1.41] | 0.94          | 41.5 (59/142)        | 48.0 (130/271)   | 0.87 [0.57-1.34] | 0.53    |
|                   | CC                         | 13.7 (40/293)        | 12.1 (31/257)    | 1.14 [0.67-1.95] | 0.62          | 14.1 (20/142)        | 7.4 (20/271)     | 1.92 [0.96-3.83] | 0.06    |
|                   | G                          | 64.3 (337/586)       | 65.4 (336/514)   | Reference        | -             | 65.1 (185/284)       | 68.6 (372/542)   | Reference        | -       |
|                   | C                          | 35.7 (209/586)       | 34.6 (178/514)   | 1.05 [0.82-1.34] | 0.72          | 34.9 (99/284)        | 31.4 (170/542)   | 1.17 [0.86-1.59] | 0.31    |
|                   | C non-carriers             | 42.3 (124/293)       | 42.8 (110/257)   | Reference        | -             | 44.4 (63/142)        | 44.6 (121/271)   | Reference        | -       |
| C carriers        | 57.7 (169/293)             | 57.2 (147/257)       | 1.02 [0.73-1.43] | 0.91             | 55.6 (79/142) | 55.4 (150/271)       | 1.01 [0.67-1.52] | 0.96             |         |

|           |                |                |                |                  |      |                |                |                  |      |
|-----------|----------------|----------------|----------------|------------------|------|----------------|----------------|------------------|------|
| rs3025020 | CC             | 52.2 (153/293) | 53.3 (136/255) | Reference        | -    | 51.1 (72/141)  | 55.4 (149/269) | Reference        | -    |
|           | CT             | 38.9 (114/293) | 37.3 (95/255)  | 1.07 [0.75-1.52] | 0.72 | 41.1 (58/141)  | 36.8 (99/269)  | 1.21 [0.79-1.86] | 0.38 |
|           | TT             | 8.9 (26/293)   | 9.4 (24/255)   | 0.96 [0.53-1.76] | 0.90 | 7.8 (11/141)   | 7.8 (21/269)   | 1.08 [0.50-2.37] | 0.84 |
|           | C              | 71.7 (420/586) | 72.0 (367/510) | Reference        | -    | 71.6 (202/282) | 73.8 (397/538) | Reference        | -    |
|           | T              | 28.3 (166/586) | 28.0 (143/510) | 1.01 [0.78-1.32] | 0.92 | 28.4 (80/282)  | 26.2 (141/538) | 1.12 [0.81-1.54] | 0.51 |
|           | T non-carriers | 52.2 (153/293) | 53.3 (136/255) | Reference        | -    | 51.1 (72/141)  | 55.4 (149/269) | Reference        | -    |
|           | T carriers     | 47.8 (140/293) | 46.7 (119/255) | 1.05 [0.75-1.46] | 0.79 | 48.9 (69/141)  | 44.6 (120/269) | 1.19 [0.79-1.79] | 0.40 |
| rs3025039 | CC             | 75.5 (222/294) | 76.3 (196/257) | Reference        | -    | 72.6 (103/142) | 81.6 (222/272) | Reference        | -    |
|           | CT             | 23.1 (68/294)  | 21.8 (56/257)  | 1.07 [0.72-1.60] | 0.74 | 21.8 (31/142)  | 16.2 (44/272)  | 1.52 [0.91-2.54] | 0.11 |
|           | TT             | 1.4 (4/294)    | 1.9 (5/257)    | 0.71 [0.19-2.67] | 0.61 | 5.6 (8/142)    | 2.2 (6/272)    | 2.87 [0.97-8.50] | 0.06 |
|           | C              | 87.1 (512/588) | 87.2 (448/514) | Reference        | -    | 83.5 (237/284) | 89.7 (488/544) | Reference        | -    |
|           | T              | 12.9 (76/588)  | 12.8 (66/514)  | 1.01 [0.71-1.43] | 0.97 | 16.5 (47/284)  | 10.3 (56/544)  | 1.73 [1.14-2.62] | 0.01 |
|           | T non-carriers | 75.5 (222/294) | 76.3 (196/257) | Reference        | -    | 72.6 (103/142) | 81.6 (222/272) | Reference        | -    |
|           | T carriers     | 24.5 (72/294)  | 23.7 (61/257)  | 1.04 [0.70-1.54] | 0.84 | 27.4 (39/142)  | 18.4 (50/272)  | 1.68 [1.04-2.72] | 0.03 |

CI: confidence interval; ILD: interstitial lung disease; N: total number of individuals successfully genotyped; OR: odds ratio; VEGF: vascular endothelial growth factor.

**Table S6.** Genotype, allele and carrier frequencies of VEGF polymorphisms in IIP and non-IIP patients, stratified according to sex.

| VEGF Polymorphism | Genotype /Allele/ Carriers | MEN                  |                          |                  |          | WOMEN                |                          |                  |          |
|-------------------|----------------------------|----------------------|--------------------------|------------------|----------|----------------------|--------------------------|------------------|----------|
|                   |                            | IIP Patients % (n/N) | Non-IIP Patients % (n/N) | OR [95% CI]*     | p value* | IIP Patients % (n/N) | Non-IIP Patients % (n/N) | OR [95% CI]*     | p value* |
| rs833061          | TT                         | 30.5 (58/190)        | 34.0 (35/103)            | Reference        | -        | 22.2 (12/54)         | 42.0 (37/88)             | Reference        | -        |
|                   | TC                         | 49.5 (94/190)        | 48.5 (50/103)            | 1.01 [0.57-1.81] | 0.97     | 48.2 (26/54)         | 42.0 (37/88)             | 2.18 [0.90-5.26] | 0.08     |
|                   | CC                         | 20.0 (38/190)        | 17.5 (18/103)            | 1.31 [0.62-2.78] | 0.48     | 29.6 (16/54)         | 16.0 (14/88)             | 3.26 [1.14-9.32] | 0.03     |
|                   | T                          | 55.3 (210/380)       | 58.3 (120/206)           | Reference        | -        | 46.3 (50/108)        | 63.1 (111/176)           | Reference        | -        |
|                   | C                          | 44.7 (170/380)       | 41.7 (86/206)            | 1.13 [0.78-1.62] | 0.52     | 53.7 (58/108)        | 36.9 (65/176)            | 1.89 [1.12-3.18] | 0.02     |

|                  |                |                   |                   |                  |      |                          |                      |                         |              |
|------------------|----------------|-------------------|-------------------|------------------|------|--------------------------|----------------------|-------------------------|--------------|
|                  | C non-carriers | 30.5<br>(58/190)  | 34.0<br>(35/103)  | Reference        | -    | 22.2 (12/54)             | 42.0 (37/88)         | Reference               | -            |
|                  | C carriers     | 69.5<br>(132/190) | 66.0<br>(68/103)  | 1.09 [0.63-1.88] | 0.76 | 77.8 (42/54)             | 58.0 (51/88)         | 2.48 [1.09-5.67]        | 0.03         |
| <b>rs1570360</b> | GG             | 50.5<br>(96/190)  | 61.2<br>(63/103)  | Reference        | -    | 37.0 (20/54)             | 60.9 (53/87)         | Reference               | -            |
|                  | GA             | 41.6<br>(79/190)  | 27.2<br>(28/103)  | 1.63 [0.92-2.87] | 0.09 | 50.0 (27/54)             | 35.6 (31/87)         | 2.11 [0.97-4.60]        | 0.06         |
|                  | AA             | 7.9 (15/190)      | 11.6<br>(12/103)  | 0.88 [0.36-2.13] | 0.77 | 13.0 (7/54)              | 3.5 (3/87)           | 8.88 [1.53-50.51]       | 0.02         |
|                  | G              | 71.3<br>(271/380) | 74.8<br>(154/206) | Reference        | -    | 62.0<br>(67/108)         | 78.7<br>(137/174)    | Reference               | -            |
|                  | A              | 26.7<br>(109/380) | 25.2<br>(52/206)  | 1.16 [0.77-1.76] | 0.48 | <b>38.0<br/>(41/108)</b> | <b>21.3 (37/174)</b> | <b>2.26 [1.27-4.02]</b> | <b>0.005</b> |
|                  | A non-carriers | 50.5<br>(96/190)  | 61.2<br>(63/103)  | Reference        | -    | 37.0 (20/54)             | 60.9 (53/87)         | Reference               | -            |
|                  | A carriers     | 49.5<br>(94/190)  | 38.8<br>(40/103)  | 1.42 [0.84-2.39] | 0.19 | 63.0 (34/54)             | 39.1 (34/87)         | 2.52 [1.19-5.34]        | 0.02         |
| <b>rs2010963</b> | GG             | 43.2<br>(82/190)  | 40.8<br>(42/103)  | Reference        | -    | 50.0 (27/54)             | 40.9 (36/88)         | Reference               | -            |
|                  | GC             | 43.2<br>(82/190)  | 45.6<br>(47/103)  | 0.79 [0.45-1.36] | 0.39 | 38.9 (21/54)             | 43.2 (38/88)         | 0.78 [0.35-1.72]        | 0.54         |
|                  | CC             | 13.6<br>(26/190)  | 13.6<br>(14/103)  | 0.71 [0.32-1.58] | 0.40 | 11.1 (6/54)              | 15.9 (14/88)         | 0.44 [0.13-1.48]        | 0.18         |
|                  | G              | 64.7<br>(246/380) | 63.6<br>(131/206) | Reference        | -    | 69.4<br>(75/108)         | 62.5<br>(110/176)    | Reference               | -            |
|                  | C              | 35.3<br>(134/380) | 36.4<br>(75/206)  | 0.82 [0.57-1.20] | 0.31 | 30.6<br>(33/108)         | 37.5 (66/176)        | 0.68 [0.39-1.19]        | 0.18         |
|                  | C non-carriers | 43.2<br>(82/190)  | 40.8<br>(42/103)  | Reference        | -    | 50.0 (27/54)             | 40.9 (36/88)         | Reference               | -            |
|                  | C carriers     | 56.8<br>(108/190) | 59.2<br>(61/103)  | 0.77 [0.46-1.29] | 0.32 | 50.0 (27/54)             | 59.1 (52/88)         | 0.68 [0.33-1.44]        | 0.32         |
| <b>rs3025020</b> | CC             | 52.1<br>(99/190)  | 52.4<br>(54/103)  | Reference        | -    | 44.4 (24/54)             | 55.2 (48/87)         | Reference               | -            |
|                  | CT             | 37.9<br>(72/190)  | 40.8<br>(42/103)  | 0.92 [0.54-1.57] | 0.75 | 46.3 (25/54)             | 37.9 (33/87)         | 1.71 [0.78-3.72]        | 0.18         |
|                  | TT             | 10.0<br>(19/190)  | 6.8 (7/103)       | 1.82 [0.62-5.35] | 0.27 | 9.3 (5/54)               | 6.9 (6/87)           | 1.39 [0.34-5.67]        | 0.64         |
|                  | C              | 71.1<br>(270/380) | 72.8<br>(150/206) | Reference        | -    | 67.6<br>(73/108)         | 74.1<br>(129/174)    | Reference               | -            |
|                  | T              | 28.9<br>(110/380) | 27.2<br>(56/206)  | 1.13 [0.75-1.69] | 0.57 | 32.4<br>(35/108)         | 25.9 (45/174)        | 1.37 [0.78-2.43]        | 0.28         |
|                  | T non-carriers | 52.1<br>(99/190)  | 52.4<br>(54/103)  | Reference        | -    | 44.4 (24/54)             | 55.2 (48/87)         | Reference               | -            |
|                  | T carriers     | 47.9<br>(91/190)  | 47.6<br>(49/103)  | 1.02 [0.61-1.70] | 0.94 | 55.6 (30/54)             | 44.8 (39/87)         | 1.65 [0.78-3.47]        | 0.19         |
| <b>rs3025039</b> | CC             | 77.8<br>(148/190) | 71.2<br>(74/104)  | Reference        | -    | 75.9 (41/54)             | 70.4 (62/88)         | Reference               | -            |
|                  | CT             | 21.1<br>(40/190)  | 26.9<br>(28/104)  | 0.59 [0.32-1.07] | 0.08 | 18.5 (10/54)             | 23.9 (21/88)         | 0.81 [0.33-2.01]        | 0.65         |

|                |                |                |                  |      |               |                |                  |      |
|----------------|----------------|----------------|------------------|------|---------------|----------------|------------------|------|
| TT             | 1.1 (2/190)    | 1.9 (2/104)    | 0.48 [0.03-8.33] | 0.61 | 5.6 (3/54)    | 5.7 (5/88)     | 1.47 [0.25-8.42] | 0.67 |
| C              | 88.4 (336/380) | 84.6 (176/208) | Reference        | -    | 85.2 (92/108) | 82.4 (145/176) | Reference        | -    |
| T              | 11.6 (44/380)  | 15.4 (32/208)  | 0.62 [0.37-1.06] | 0.08 | 14.8 (16/108) | 17.6 (31/176)  | 1.00 [0.49-2.04] | 0.99 |
| T non-carriers | 77.8 (148/190) | 71.2 (74/104)  | Reference        | -    | 75.9 (41/54)  | 70.4 (62/88)   | Reference        | -    |
| T carriers     | 22.2 (42/190)  | 28.9 (30/104)  | 0.58 [0.32-1.05] | 0.07 | 24.1 (13/54)  | 29.6 (26/88)   | 0.90 [0.39-2.08] | 0.81 |

\*OR [95% CI] and p values were adjusted by age, smoking history and packs of cigarettes per year.

Significant results are highlighted in **bold**.

CI: confidence interval; IIP: idiopathic interstitial pneumonia; N: total number of individuals successfully genotyped; OR: odds ratio; VEGF: vascular endothelial growth factor.

**Table S7.** Influence of VEGF polymorphisms on the pulmonary function tests of IIP and non-IIP patients.

| Pulmonary function tests      | VEGF polymorphism             | Carriers        | IIP patients          | Non-IIP patients |               |
|-------------------------------|-------------------------------|-----------------|-----------------------|------------------|---------------|
| FVC (% predicted), mean ± SD  | <b>rs833061</b>               | C non-carriers  | 76.15 ± 22.54         | 82.46 ± 26.88    |               |
|                               |                               | C carriers      | 71.75 ± 22.67         | 80.92 ± 23.54    |               |
|                               | <b>rs1570360</b>              | A non-carriers  | 76.41 ± 22.28         | 80.11 ± 25.37    |               |
|                               |                               | A carriers      | 69.92 ± 22.67         | 83.50 ± 23.99    |               |
|                               | <b>rs2010963</b>              | C non-carriers  | 70.29 ± 21.41         | 83.11 ± 24.94    |               |
|                               |                               | C carriers      | 75.19 ± 23.49         | 80.90 ± 25.11    |               |
|                               | <b>rs3025020</b>              | T non-carriers  | 73.53 ± 21.06         | 83.56 ± 26.16    |               |
|                               |                               | T carriers      | 72.47 ± 24.28         | 79.70 ± 23.67    |               |
|                               | <b>rs3025039</b>              | T non-carriers  | 72.05 ± 22.61         | 81.42 ± 23.45    |               |
|                               |                               | T carriers      | 76.24 ± 22.81         | 82.52 ± 28.50    |               |
|                               | FEV1 (% predicted), mean ± SD | <b>rs833061</b> | C non-carriers        | 75.20 ± 20.69    | 78.21 ± 26.21 |
|                               |                               |                 | C carriers            | 71.78 ± 22.97    | 72.32 ± 23.87 |
| <b>rs1570360</b>              |                               | A non-carriers  | <b>76.44 ± 21.88*</b> | 75.19 ± 24.67    |               |
|                               |                               | A carriers      | <b>69.41 ± 22.34*</b> | 73.15 ± 25.25    |               |
| <b>rs2010963</b>              |                               | C non-carriers  | 69.37 ± 21.33         | 75.86 ± 24.56    |               |
|                               |                               | C carriers      | 75.47 ± 22.87         | 74.15 ± 25.56    |               |
| <b>rs3025020</b>              |                               | T non-carriers  | 73.12 ± 21.18         | 78.44 ± 25.70    |               |
|                               |                               | T carriers      | 72.37 ± 23.58         | 70.50 ± 23.95    |               |
| <b>rs3025039</b>              |                               | T non-carriers  | 72.23 ± 23.15         | 74.56 ± 24.11    |               |
|                               |                               | T carriers      | 74.52 ± 19.50         | 75.44 ± 27.41    |               |
| DLCO (% predicted), mean ± SD |                               | <b>rs833061</b> | C non-carriers        | 37.39 ± 14.56    | 40.00 ± 18.12 |
|                               |                               |                 | C carriers            | 34.22 ± 15.12    | 36.08 ± 14.83 |
|                               | <b>rs1570360</b>              | A non-carriers  | <b>38.30 ± 15.03#</b> | 37.58 ± 17.16    |               |
|                               |                               | A carriers      | <b>32.07 ± 14.34#</b> | 36.64 ± 13.81    |               |
|                               | <b>rs2010963</b>              | C non-carriers  | 33.93 ± 14.24         | 37.50 ± 18.08    |               |
|                               |                               | C carriers      | 36.16 ± 15.51         | 38.46 ± 15.30    |               |
|                               | <b>rs3025020</b>              | T non-carriers  | 36.50 ± 15.74         | 38.08 ± 17.45    |               |
|                               |                               | T carriers      | 34.07 ± 14.27         | 37.58 ± 15.79    |               |
|                               | <b>rs3025039</b>              | T non-carriers  | 36.09 ± 15.73         | 38.21 ± 16.82    |               |
|                               |                               | T carriers      | 32.12 ± 11.66         | 36.96 ± 16.15    |               |

DLCO: diffusing capacity of the lungs for carbon monoxide; FEV1: forced expiratory volume in one second; FVC: forced vital capacity; IIP: idiopathic interstitial pneumonia; SD: standard deviation; VEGF: vascular endothelial growth factor.

PFTs values are shown as mean  $\pm$  SD.

\*Statistically significant differences obtained after adjustment by sex, age, smoking history and packs of cigarettes per year ( $p = 0.004$ ).

†Statistically significant differences obtained after adjustment by sex, age, smoking history and packs of cigarettes per year ( $p = 0.008$ ).

**Table S8.** Influence of VEGF polymorphisms on the VEGF serum levels in IIP and non-IIP patients.

| VEGF polymorphism | Carriers       | VEGF Serum Levels, Mean $\pm$ SD, pg/mL |                     |
|-------------------|----------------|-----------------------------------------|---------------------|
|                   |                | IIP Patients                            | Non-IIP Patients    |
| rs833061          | C non-carriers | 95.87 $\pm$ 115.43                      | 103.83 $\pm$ 84.32  |
|                   | C carriers     | 97.60 $\pm$ 117.56                      | 123.85 $\pm$ 131.15 |
| rs1570360         | A non-carriers | 91.55 $\pm$ 104.41                      | 105.11 $\pm$ 80.03  |
|                   | A carriers     | 102.24 $\pm$ 127.25                     | 135.81 $\pm$ 158.14 |
| rs2010963         | C non-carriers | 91.04 $\pm$ 123.18                      | 117.98 $\pm$ 112.54 |
|                   | C carriers     | 101.92 $\pm$ 111.51                     | 114.94 $\pm$ 118.09 |
| rs3025020         | T non-carriers | 94.39 $\pm$ 105.82                      | 118.38 $\pm$ 106.02 |
|                   | T carriers     | 99.46 $\pm$ 125.80                      | 114.70 $\pm$ 128.09 |
| rs3025039         | T non-carriers | 91.00 $\pm$ 113.76                      | 120.62 $\pm$ 130.60 |
|                   | T carriers     | 124.77 $\pm$ 127.10                     | 105.32 $\pm$ 71.53  |

IIP: idiopathic interstitial pneumonia; SD: standard deviation; VEGF: vascular endothelial growth factor.

Comparisons between non-carriers and carriers of each polymorphism did not show statistically significant differences after adjustment by sex, age, smoking history and packs of cigarettes per year ( $p > 0.01$ ).
